# Supplementary material
Source: PubMed Central journal article supplement (PMC8297914)
Supplement: NIHMS1721373-supplement-tS1.pdf [file NIHMS1721373-supplement-tS1.pdf]

| <b>Supplementary Table S1. Odds<sup>a</sup> of Subclinical and Clinical Anemia Associated with Fatigability and Fatigue Symptoms by Race</b>                                                                                                                                                                                                                                                                               |                                  |                                             |                |
|----------------------------------------------------------------------------------------------------------------------------------------------------------------------------------------------------------------------------------------------------------------------------------------------------------------------------------------------------------------------------------------------------------------------------|----------------------------------|---------------------------------------------|----------------|
| <b>Fatigability/Fatigue Symptom</b>                                                                                                                                                                                                                                                                                                                                                                                        | <b>Anemia Status<sup>b</sup></b> | <b>Odds Ratio (95% Confidence Interval)</b> | <b>p-value</b> |
| <b>White Race (N=668)</b>                                                                                                                                                                                                                                                                                                                                                                                                  |                                  |                                             |                |
| Fatigability RPE <sup>c</sup>                                                                                                                                                                                                                                                                                                                                                                                              | Subclinical                      | 1.10 (1.01-1.20)                            | .025           |
|                                                                                                                                                                                                                                                                                                                                                                                                                            | Clinical                         | 1.18 (1.05-1.32)                            | .004           |
| High fatigability (RPE≥10)                                                                                                                                                                                                                                                                                                                                                                                                 | Subclinical                      | 1.32 (0.86-2.03)                            | .21            |
|                                                                                                                                                                                                                                                                                                                                                                                                                            | Clinical                         | 2.42 (1.93-4.22)                            | .002           |
| Unusual tiredness past month                                                                                                                                                                                                                                                                                                                                                                                               | Subclinical                      | 1.45 (1.01-2.09)                            | .048           |
|                                                                                                                                                                                                                                                                                                                                                                                                                            | Clinical                         | 1.40 (0.83-2.35)                            | .20            |
| <b>Black Race (N=237)</b>                                                                                                                                                                                                                                                                                                                                                                                                  |                                  |                                             |                |
| Fatigability RPE <sup>c</sup>                                                                                                                                                                                                                                                                                                                                                                                              | Subclinical                      | 1.06 (0.91-1.22)                            | .46            |
|                                                                                                                                                                                                                                                                                                                                                                                                                            | Clinical                         | 1.02 (0.86-1.21)                            | .83            |
| High fatigability (RPE≥10)                                                                                                                                                                                                                                                                                                                                                                                                 | Subclinical                      | 0.89 (0.45-1.78)                            | .75            |
|                                                                                                                                                                                                                                                                                                                                                                                                                            | Clinical                         | 1.08 (0.47-2.48)                            | .85            |
| Unusual tiredness past month                                                                                                                                                                                                                                                                                                                                                                                               | Subclinical                      | 1.28 (0.69-2.36)                            | .43            |
|                                                                                                                                                                                                                                                                                                                                                                                                                            | Clinical                         | 1.10 (0.50-2.38)                            | .82            |
| <sup>a</sup> Adjusted for age, age-squared, sex, weight, height, waist circumference, smoking status and exercise level<br><sup>b</sup> World Health Organization cutpoints of <13g/dL of hemoglobin for men and <12g/dL for women were used to define clinical anemia. Subclinical anemia was defined as hemoglobin values of 13-13.9g/dL for men and 12-12.9g/dL for women.<br><sup>c</sup> Rating of perceived exertion |                                  |                                             |                |

| <b>Supplementary Table S2. Odds<sup>a</sup> of Persistent or Incident Subclinical and Clinical Anemia<sup>b</sup> Associated with Fatigability and Fatigue Symptoms by Race</b>                                                                                                                                                                                                                                                                                    |                                             |                |
|--------------------------------------------------------------------------------------------------------------------------------------------------------------------------------------------------------------------------------------------------------------------------------------------------------------------------------------------------------------------------------------------------------------------------------------------------------------------|---------------------------------------------|----------------|
| <b>Fatigability/Fatigue Symptom</b>                                                                                                                                                                                                                                                                                                                                                                                                                                | <b>Odds ratio (95% Confidence Interval)</b> | <b>p-value</b> |
| <b>White Race (N=482)</b>                                                                                                                                                                                                                                                                                                                                                                                                                                          |                                             |                |
| Persistent or Incident Subclinical or Clinical Anemia                                                                                                                                                                                                                                                                                                                                                                                                              |                                             |                |
| Fatigability RPE <sup>c</sup>                                                                                                                                                                                                                                                                                                                                                                                                                                      | 1.13 (1.03-1.25)                            | .013           |
| High Fatigability                                                                                                                                                                                                                                                                                                                                                                                                                                                  | 1.83 (1.15-2.91)                            | .011           |
| Persistent or Incident Subclinical Anemia                                                                                                                                                                                                                                                                                                                                                                                                                          |                                             |                |
| Fatigability RPE                                                                                                                                                                                                                                                                                                                                                                                                                                                   | 1.10 (0.98-1.24)                            | .09            |
| High fatigability                                                                                                                                                                                                                                                                                                                                                                                                                                                  | 1.60 (0.93-2.76)                            | .09            |
| Persistent or Incident Clinical Anemia                                                                                                                                                                                                                                                                                                                                                                                                                             |                                             |                |
| Fatigability RPE                                                                                                                                                                                                                                                                                                                                                                                                                                                   | 1.18 (1.04-1.34)                            | .013           |
| High fatigability                                                                                                                                                                                                                                                                                                                                                                                                                                                  | 2.28 (1.24-4.23)                            | .008           |
| <b>Black Race (N=176)</b>                                                                                                                                                                                                                                                                                                                                                                                                                                          |                                             |                |
| Persistent or Incident Subclinical or Clinical Anemia                                                                                                                                                                                                                                                                                                                                                                                                              |                                             |                |
| Fatigability RPE <sup>c</sup>                                                                                                                                                                                                                                                                                                                                                                                                                                      | 1.03 (0.87-1.21)                            | .75            |
| High Fatigability                                                                                                                                                                                                                                                                                                                                                                                                                                                  | 0.80 (0.37-1.73)                            | .57            |
| Persistent or Incident Subclinical Anemia                                                                                                                                                                                                                                                                                                                                                                                                                          |                                             |                |
| Fatigability RPE                                                                                                                                                                                                                                                                                                                                                                                                                                                   | 1.04 (0.86-1.25)                            | .71            |
| High fatigability                                                                                                                                                                                                                                                                                                                                                                                                                                                  | 0.93 (0.39-2.20)                            | .86            |
| Persistent or Incident Clinical Anemia                                                                                                                                                                                                                                                                                                                                                                                                                             |                                             |                |
| Fatigability RPE                                                                                                                                                                                                                                                                                                                                                                                                                                                   | 1.02 (0.84-1.24)                            | .83            |
| High fatigability                                                                                                                                                                                                                                                                                                                                                                                                                                                  | 0.67 (0.26-1.74)                            | .41            |
| <sup>a</sup> Adjusted for age, age-squared, sex, weight, height, waist circumference, smoking status, exercise level and time between index and follow-up visit<br><sup>b</sup> World Health Organization cutpoints of <13g/dL of hemoglobin for men and <12g/dL for women were used to define clinical anemia. Subclinical anemia was defined as hemoglobin values of 13-13.9g/dL for men and 12-12.9g/dL for women.<br><sup>c</sup> Rating of perceived exertion |                                             |                |
